# Supplementary material
Source: MDPI journal article supplement (https://www.mdpi.com/2673-1991/4/1/12)
Supplement: s1 [file s1]

Supplementary File: Bracs Trial Supplementary DATA.

**Supplementary File S1.** Scar thickness for participants < 8 years.

| Scar Thickness                | Silver Dressings |             | RES™/ Biobrane®  |             | Biobrane only®   |             |
|-------------------------------|------------------|-------------|------------------|-------------|------------------|-------------|
|                               | Median (IQR)     | Mean (SD)   | Median (IQR)     | Mean (SD)   | Median (IQR)     | Mean (SD)   |
| <b>3-month Follow-up (n)</b>  |                  | 5           |                  | 4           |                  | 5           |
| Scar thickness (mm)           | 1.37 (0.96-1.97) | 1.45 (0.64) | 1.16 (1.00-1.31) | 1.16 (0.19) | 1.14 (0.98-5.02) | 2.62 (2.70) |
| <b>6-month Follow-up (n)</b>  |                  | 7           |                  | 4           |                  | 5           |
| Scar thickness (mm)           | 1.97 (1.28-2.43) | 1.88 (0.61) | 1.19 (1.14-1.27) | 1.20 (0.07) | 1.75 (1.31-5.72) | 3.16 (3.30) |
| <b>12-month Follow-up (n)</b> |                  | 5           |                  | 4           |                  | 4           |
| Scar thickness (mm)           | 1.32 (0.85-2.92) | 1.77 (1.22) | 1.08 (0.97-1.49) | 1.18 (0.29) | 1.59 (1.35-2.94) | 1.96 (0.94) |

**Abbreviation:** IQR: interquartile range; SD: standard deviation; RES™: Regenerative Epidermal Suspension.

**Supplementary File S2. Scar colorimetry for participants < 8 years.**

| Scar Colorimetry                    | Silver Dressings     |               | RES <sup>TM</sup> / Biobrane <sup>®</sup> |               | Biobrane only <sup>®</sup> |              |
|-------------------------------------|----------------------|---------------|-------------------------------------------|---------------|----------------------------|--------------|
|                                     | Median (IQR)         | Mean (SD)     | Median (IQR)                              | Mean (SD)     | Median (IQR)               | Mean (SD)    |
| <b>3-month Follow-up(<i>n</i>)</b>  | 7                    |               | 5                                         |               | 5                          |              |
| L* <sub>Scar</sub>                  | 36.51 (16.85-40.24)  | 30.43 (12.45) | 37.42 (20.23-54.38)                       | 37.33 (19.77) | 29.70 (27.20-34.62)        | 30.67 (4.22) |
| L* <sub>Normal</sub>                | 44.151 (33.76-48.81) | 41.54 (10.35) | 34.77 (18.82-47.98)                       | 33.67 (17.27) | 37.25 (33.87-39.18)        | 36.67 (3.08) |
| a* <sub>Scar</sub>                  | 19.84 (11.86-33.62)  | 22.92 (12.58) | 21.02 (12.89-26.12)                       | 19.81 (7.93)  | 20.49 (16.28-25.89)        | 20.97 (5.77) |
| a* <sub>Normal</sub>                | 17.78 (9.47-19.07)   | 16.17 (6.13)  | 17.99 (14.55-25.07)                       | 17.99 (5.54)  | 13.93 (13.18-21.69)        | 16.73 (4.54) |
| b* <sub>Scar</sub>                  | 12.11 (8.38-15.45)   | 11.86 (8.38)  | 7.57 (4.39-12.33)                         | 8.20 (5.04)   | 11.61 (6.93-16.33)         | 11.62 (4.79) |
| b* <sub>Normal</sub>                | 19.29 (13.74-21.04)  | 18.07 (3.64)  | 9.84 (7.89-18.78)                         | 12.63 (5.85)  | 14.88 (7.78-18.72)         | 13.57 (5.86) |
| <b>6-month Follow-up(<i>n</i>)</b>  | 6                    |               | 5                                         |               | 5                          |              |
| L* <sub>Scar</sub>                  | 40.36 (28.80-45.57)  | 38.47 (10.53) | 38.32 (30.02-40.31)                       | 35.79 (5.76)  | 25.81 (18.20-35.69)        | 26.72 (9.78) |
| L* <sub>Normal</sub>                | 41.23 (31.16-54.93)  | 41.93 (12.78) | 37.05 (29.97-40.19)                       | 35.47 (5.87)  | 35.08 (31.59-40.24)        | 35.75 (4.85) |
| a* <sub>Scar</sub>                  | 21.29 (11.36-25.90)  | 19.75 (8.30)  | 22.08 (15.69-27.09)                       | 21.53 (6.16)  | 20.67 (14.13-23.93)        | 19.36 (6.00) |
| a* <sub>Normal</sub>                | 14.63 (11.7-22.48)   | 16.36(2.45)   | 14.42 (12.71-18.31)                       | 15.29 (3.21)  | 15.34 (11.57-18.46)        | 15.08 (3.59) |
| b* <sub>Scar</sub>                  | 15.49 (12.01-20.50)  | 16.41 (5.02)  | 11.15 (8.65-16.80)                        | 12.41 (5.77)  | 12.51 (9.11-16.52)         | 12.75 (4.06) |
| b* <sub>Normal</sub>                | 15.61 (14.55-17.70)  | 16.33 (2.45)  | 15.44 (11.48-17.74)                       | 14.78 (4.03)  | 19.09 (9.32-25.95)         | 17.63 (9.37) |
| <b>12-month Follow-up(<i>n</i>)</b> | 4                    |               | 4                                         |               | 5                          |              |
| L* <sub>Scar</sub>                  | 32.10 (15.61-40.90)  | 29.54 (14.06) | 35.78 (15.80-41.26)                       | 30.95 (14.46) | 39.13 (30.05-45.00)        | 38.06 (8.18) |
| L* <sub>Normal</sub>                | 29.84 (26.60-40.89)  | 32.44 (8.12)  | 32.18 (16.53-46.78)                       | 31.53 (16.10) | 43.73 (33.80-46.58)        | 41.37 (7.26) |
| a* <sub>Scar</sub>                  | 14.23 (9.91-18.70)   | 14.28 (4.62)  | 13.35 (10.05-16.84)                       | 13.41 (3.55)  | 15.12 (13.07-17.57)        | 15.25 (2.34) |
| a* <sub>Normal</sub>                | 13.53 (12.57-14.38)  | 13.49 (0.98)  | 13.24 (11.17-15.76)                       | 13.24 (2.57)  | 11.23 (10.16-15.88)        | 12.43 (3.40) |
| b* <sub>Scar</sub>                  | 13.94 (10.88-16.85)  | 13.89 (3.09)  | 14.29 (8.88-16.87)                        | 13.35 (4.30)  | 9.35 (3.28-18.11)          | 10.24 (7.84) |
| b* <sub>Normal</sub>                | 16.87 (15.02-18.27)  | 16.72 (1.73)  | 15.61 (10.91-18.26)                       | 14.93 (3.95)  | 14.85 (12.77-18.94)        | 15.52 (3.33) |

**Abbreviation:** IQR: Interquartile range; SD: Standard deviation; RES<sup>TM</sup>: Regenerative Epidermal Suspension; L\*: Lightness; a\*: erythema; b\*: pigmentation.

**Supplementary File S3.** Clinician report of scar severity with OSAS for participants < 8 years.

| Clinician OSAS < 8 years            | Silver Dressings   |             | RES™ /Biobrane®    |             | Biobrane only®     |             |
|-------------------------------------|--------------------|-------------|--------------------|-------------|--------------------|-------------|
|                                     | Median (IQR)       | Mean (SD)   | Median (IQR)       | Mean (SD)   | Median (IQR)       | Mean (SD)   |
| <b>3-month Follow-up(<i>n</i>)</b>  | <b>7</b>           |             | <b>6</b>           |             | <b>5</b>           |             |
| Scar Age post injury (months)       | 2.00(2.00-4.00)    | 2.71(0.95)  | 3.00(2.00-6.00)    | 4.67(5.09)  | 2.00(2.00-3.00)    | 2.40(0.55)  |
| Vascularity                         | 2.00(1.00-4.00)    | 2.57(1.72)  | 1.50(1.00-2.25)    | 1.67(0.82)  | 4.00(2.00-8.50)    | 5.00(3.39)  |
| Pigmentation                        | 3.00(2.00-7.00)    | 4.57(2.99)  | 4.00(1.00-4.00)    | 3.00(1.50)  | 4.00(2.50-5.00)    | 3.80(1.48)  |
| Thickness                           | 3.00(1.00-8.00)    | 3.57(3.16)  | 1.00(1.00-1.00)    | 1.00(0.00)  | 4.00(1.50-7.50)    | 4.40(3.51)  |
| Relief                              | 4.00(1.00-7.00)    | 3.57(2.70)  | 1.00(1.00-1.25)    | 1.17(0.41)  | 3.00(2.00-8.00)    | 4.60(3.13)  |
| Pliability                          | 2.00(1.00-7.00)    | 3.43(3.60)  | 1.00(1.00-1.00)    | 1.00(0.00)  | 3.00(1.50-6.00)    | 3.60(2.70)  |
| Overall Opinion                     | 3.00(2.00-4.00)    | 3.57(2.23)  | 4.00(2.75-4.00)    | 3.50(0.84)  | 4.00(2.50-7.00)    | 4.60(2.30)  |
| <b>6-month Follow-up(<i>n</i>)</b>  | <b>7</b>           |             | <b>4</b>           |             | <b>5</b>           |             |
| Scar Age post injury (months)       | 5.00(5.00-6.00)    | 5.43(0.54)  | 5.00(5.00-5.75)    | 5.25(0.50)  | 6.00(5.00-7.00)    | 6.00(1.00)  |
| Vascularity                         | 3.00(1.00-3.00)    | 2.43(1.13)  | 1.50(1.00-2.00)    | 1.50(0.58)  | 4.00(2.50-7.00)    | 4.60(2.30)  |
| Pigmentation                        | 3.00(2.00-5.00)    | 3.57(2.23)  | 2.00(1.00-6.75)    | 3.25(3.30)  | 2.00(2.00-2.00)    | 2.00(0.00)  |
| Thickness                           | 4.00(1.00-6.00)    | 3.71(3.04)  | 1.00(1.00-1.00)    | 1.00(0.00)  | 3.00(2.00-8.00)    | 4.60(3.51)  |
| Relief                              | 3.00(1.00-6.00)    | 3.29(2.36)  | 1.00(1.00-1.00)    | 1.00(0.00)  | 4.00(1.50-8.50)    | 4.80(3.56)  |
| Pliability                          | 2.00(1.00-5.00)    | 3.14(2.67)  | 1.00(1.00-1.75)    | 1.25(0.50)  | 3.00(1.50-6.50)    | 3.80(2.78)  |
| Overall Opinion                     | 3.00(2.00-6.00)    | 3.57(2.23)  | 2.00(1.25-5.00)    | 2.75(2.22)  | 4.00(2.50-7.50)    | 4.80(2.59)  |
| <b>12-month Follow-up(<i>n</i>)</b> | <b>5</b>           |             | <b>4</b>           |             | <b>4</b>           |             |
| Scar Age post injury (months)       | 12.00(11.50-12.00) | 11.80(0.45) | 11.50(11.00-12.00) | 11.50(0.58) | 12.00(11.25-12.00) | 11.75(0.50) |
| Vascularity                         | 1.00(1.00-2.00)    | 1.40(0.55)  | 1.00(1.00-1.75)    | 1.00(0.50)  | 1.50(1.00-5.00)    | 2.50(2.38)  |
| Pigmentation                        | 2.00(1.50-6.50)    | 3.60(3.65)  | 3.00(1.25-6.25)    | 3.50(2.65)  | 2.50(2.00-4.50)    | 3.00(1.41)  |
| Thickness                           | 2.00(1.00-5.00)    | 2.80(2.95)  | 1.00(1.00-1.75)    | 1.25(0.50)  | 3.00(1.25-7.00)    | 3.75(3.10)  |
| Relief                              | 1.00(1.00-4.00)    | 2.40(2.61)  | 0.50(0.00-1.00)    | 0.50(0.58)  | 2.50(1.25-8.25)    | 4.00(4.08)  |
| Pliability                          | 1.00(1.00-4.00)    | 2.20(2.68)  | 1.00(1.00-1.00)    | 1.00(0.00)  | 1.50(1.00-7.25)    | 3.25(3.86)  |
| Overall Opinion                     | 2.00(2.00-5.50)    | 3.40(3.13)  | 2.00(1.25-2.75)    | 2.00(0.82)  | 2.50(2.00-6.75)    | 3.75(2.87)  |

**Abbreviation:** IQR: Interquartile range; SD: Standard deviation; RES™: Regenerative Epidermal Suspension; OSAS: Observer Scar Assessment Scale.

**Supplementary File S4.** Parent/guardian report of scar severity with POSAS for participants < 8 years.

| Parent/Guardian POSAS < 8years | Silver Dressings    |               | REST <sup>TM</sup> /Biobrane <sup>®</sup> |               | Biobrane only <sup>®</sup> |               |
|--------------------------------|---------------------|---------------|-------------------------------------------|---------------|----------------------------|---------------|
|                                | Median (IQR)        | Mean (SD)     | Median (IQR)                              | Mean (SD)     | Median (IQR)               | Mean (SD)     |
| <b>3-month Follow-up (n)</b>   | 6                   |               | 6                                         |               | 5                          |               |
| Scar Age post injury (months)  | 2.50 (2.00-4.00)    | 2.83 (0.98)   | 2.50 (2.00-3.00)                          | 2.50 (0.55)   | 2.00 (2.00-3.00)           | 2.40 (0.55)   |
| Pain                           | 1.00 (1.00-1.00)    | 1.00 (0.00)   | 1.00 (1.00-1.25)                          | 1.17 (0.41)   | 1.00 (1.00-2.50)           | 1.60 (0.90)   |
| Itch                           | 1.00 (1.00-5.75)    | 2.83 (2.99)   | 1.50 (1.00-2.75)                          | 2.00 (1.55)   | 3.00 (1.50-9.00)           | 4.80 (4.03)   |
| Colour                         | 9.00 (4.50-10.00)   | 7.67 (3.01)   | 6.00 (5.50-6.50)                          | 6.00 (1.27)   | 9.00 (6.00-9.50)           | 8.00 (1.87)   |
| Stiffness                      | 4.00 (1.00-8.00)    | 4.33 (3.67)   | 3.00 (1.00-6.50)                          | 3.67 (2.81)   | 5.00 (3.00-9.50)           | 6.00 (3.32)   |
| Thickness                      | 5.50 (1.00-9.25)    | 5.33 (4.13)   | 2.00 (1.00-6.50)                          | 3.33 (3.01)   | 8.00 (2.50-10.00)          | 6.60 (3.98)   |
| Irregular                      | 5.00 (1.00-10.00)   | 5.33 (4.46)   | 5.50 (1.75-8.00)                          | 5.00 (2.97)   | 8.00 (4.00-10.00)          | 7.20 (3.03)   |
| Overall Opinion                | 7.00 (2.75-10.00)   | 6.50 (3.45)   | 5.50 (4.50-7.50)                          | 5.83 (2.04)   | 9.00 (4.00-10.00)          | 7.40 (3.13)   |
| POSAS Score                    | 26.50 (13.50-40.00) | 26.50 (14.00) | 19.00 (13.50-29.75)                       | 21.17 (10.15) | 40.00 (19.50-46.00)        | 34.20 (14.13) |
| <b>6-month Follow-up (n)</b>   | 7                   |               | 6                                         |               | 5                          |               |
| Scar Age post injury (months)  | 5.00 (5.00-6.00)    | 5.43 (0.54)   | 5.50 (5.00-6.25)                          | 5.67 (0.82)   | 6.00 (5.00-6.50)           | 5.80 (0.84)   |
| Pain                           | 1.00 (1.00-1.00)    | 1.00 (0.00)   | 1.00 (1.00-1.00)                          | 1.00 (0.00)   | 1.00 (1.00-2.00)           | 1.40 (0.55)   |
| Itch                           | 3.00 (1.00-6.00)    | 3.43 (2.64)   | 1.00 (1.00-1.00)                          | 1.00 (0.00)   | 3.00 (1.00-7.00)           | 3.80 (3.11)   |
| Colour                         | 3.00 (2.00-9.00)    | 5.14 (3.67)   | 3.00 (2.75-5.00)                          | 3.50 (1.23)   | 6.00 (4.00-6.50)           | 5.40 (1.52)   |
| Stiffness                      | 2.00 (1.00-6.00)    | 4.00 (3.42)   | 1.00 (1.00-2.25)                          | 1.50 (0.84)   | 4.00 (2.00-6.50)           | 4.20 (2.39)   |
| Thickness                      | 4.00 (1.00-8.00)    | 4.57 (3.55)   | 1.00 (1.00-3.00)                          | 1.67 (1.03)   | 6.00 (2.50-7.50)           | 5.20 (2.78)   |
| Irregular                      | 2.00 (1.00-10.00)   | 4.57 (4.08)   | 1.00 (1.00-1.50)                          | 1.33 (0.82)   | 6.00 (2.50-7.50)           | 5.20 (2.59)   |
| Overall Opinion                | 5.00 (3.00-10.00)   | 5.86 (3.44)   | 2.00 (1.00-3.00)                          | 2.00 (0.89)   | 6.00 (3.00-7.00)           | 5.20 (2.05)   |
| POSAS Score                    | 17.00 (11.00-37.00) | 22.71 (13.91) | 9.00 (2.00-1.00)                          | 7.67 (4.80)   | 26.00 (14.50-35.50)        | 25.20 (11.21) |
| <b>12-month Follow-up (n)</b>  | 7                   |               | 5                                         |               | 4                          |               |
| Scar Age post injury (months)  | 12.00 (11.00-12.00) | 11.71 (0.49)  | 12.00 (11.00-12.50)                       | 11.80 (0.84)  | 12.00 (11.25-12.00)        | 11.75 (0.50)  |
| Pain                           | 1.00 (1.00-1.00)    | 1.00 (0.00)   | 1.00 (1.00-1.00)                          | 1.00 (0.00)   | 1.00 (1.00-1.00)           | 1.00 (0.00)   |
| Itch                           | 1.00 (1.00-4.00)    | 2.14 (1.46)   | 1.00 (1.00-1.00)                          | 1.00 (0.00)   | 2.00 (1.25-3.50)           | 2.25 (1.26)   |
| Colour                         | 3.00 (1.00-7.00)    | 4.00 (3.37)   | 2.00 (1.00-4.00)                          | 2.40 (1.67)   | 5.50 (4.00-8.50)           | 6.00 (2.45)   |
| Stiffness                      | 3.00 (1.00-5.00)    | 3.71 (2.87)   | 1.00 (1.00-2.00)                          | 1.40 (0.55)   | 2.50 (2.00-5.25)           | 3.25 (1.89)   |
| Thickness                      | 3.00 (1.00-7.00)    | 4.14 (3.19)   | 1.00 (1.00-3.00)                          | 1.80 (1.30)   | 4.50 (3.00-7.50)           | 5.00 (2.45)   |
| Irregular                      | 3.00 (1.00-6.00)    | 3.57 (2.94)   | 1.00 (1.00-3.00)                          | 1.80 (1.30)   | 4.50 (3.00-7.50)           | 5.00 (2.45)   |
| Overall Opinion                | 3.00 (1.00-6.00)    | 3.86 (2.97)   | 2.00 (1.00-3.50)                          | 2.20 (1.64)   | 3.50 (3.00-5.50)           | 4.00 (1.41)   |
| POSAS Score                    | 14.00 (6.00-27.00)  | 18.00 (14.06) | 9.00 (4.00-13.00)                         | 8.60 (5.18)   | 22.50 (14.75-30.25)        | 22.50 (8.27)  |

**Abbreviation:** IQR: Interquartile range; SD: Standard deviation; REST<sup>TM</sup>: Regenerative Epidermal Suspension; POSAS: Patient Observer Scar Assessment Scale.

**Supplementary File S5.** Parent/guardian report of scar specific health related quality of life with BBSIP for participants < 8 years old.

| Parent/Guardian BBSIP <8 years                          | Silver Dressings        |                    | RES™/Biobrane®          |                    | Biobrane only®          |                    |
|---------------------------------------------------------|-------------------------|--------------------|-------------------------|--------------------|-------------------------|--------------------|
|                                                         | Median (IQR)            | Mean (SD)          | Median (IQR)            | Mean (SD)          | Median (IQR)            | Mean (SD)          |
| <b>3-month Follow-up (n)</b>                            | <b>7</b>                |                    | <b>6</b>                |                    | <b>4</b>                |                    |
| Scar age post injury(months)                            | 3.00 (3.00-4.00)        | 3.29 (0.49)        | 3.00 (2.75 -3.25)       | 3.00 (0.63)        | 3.00 (300-3.00)         | 3.00 (0.00)        |
| <i>Overall impact of burns</i>                          | <i>2.13 (1.63-3.13)</i> | <i>2.21 (0.83)</i> | <i>1.44 (1.34-2.00)</i> | <i>1.63 (0.43)</i> | <i>2.63 (1.50-2.82)</i> | <i>2.31 (0.80)</i> |
| Sensory Frequency                                       | 1.67 (1.00-3.33)        | 2.14 (1.15)        | 1.50 (1.00-2.08)        | 1.67 (0.87)        | 2.67 (1.25-3.33)        | 2.42 (1.13)        |
| Sensory Sensitivity                                     | 2.00 (1.00-4.00)        | 2.29 (2.06)        | 1.00 (0.75-2.00)        | 1.50 (1.76)        | 4.50 (1.50-6.00)        | 4.00 (2.45)        |
| Mobility                                                | 1.25 (1.25-2.00)        | 1.54 (0.53)        | 1.25 (1.19-2.63)        | 1.79 (1.05)        | 2.25 (1.44-2.69)        | 2.13 (0.66)        |
| Daily Living                                            | 1.56 (1.11-2.33)        | 1.76 (0.58)        | 1.33 (1.08-2.50)        | 1.76 (1.02)        | 2.00 (1.17-2.75)        | 1.97 (0.82)        |
| Impact of scar daily routine                            | 2.00 (1.00-300)         | 2.29 (1.80)        | 1.00 (1.00-1.00)        | 1.00 (0.00)        | 2.00 (1.25-2.00)        | 1.75 (0.50)        |
| Impact of scar on developing independence or new skills | 1.00 (1.00-1.00)        | 1.00 (0.00)        | 1.00 (1.00-1.00)        | 1.00 (0.00)        | 1.00 (1.00-1.75)        | 1.25 (0.50)        |
| Friendship and social interaction                       | 1.00 (1.00-2.00)        | 1.62 (1.25)        | 1.00 (1.00-1.08)        | 1.05 (0.14)        | 1.50 (1.0-2.00)         | 1.42 (0.32)        |
| Appearance                                              | 2.33 (1.00-4.00)        | 2.33 (1.37)        | 2.00 (1.25-2.92)        | 2.11 (0.98)        | 2.33 (1.25-2.67)        | 2.08 (0.79)        |
| Child bothered by scar appearance                       | 1.00 (1.00-1.00)        | 1.00 (0.58)        | 1.00 (1.00-1.50)        | 1.33 (0.82)        | 1.50 (1.00-2.00)        | 1.50 (0.58)        |
| Emotional reactions                                     | 1.14 (1.14-1.43)        | 1.29 (0.27)        | 1.14 (1.14-1.32)        | 1.27 (0.29)        | 1.86(1.29-2.11)         | 1.75 (0.44)        |
| Physical symptoms                                       | 2.29 (1.29-3.14)        | 2.20 (0.86)        | 1.43 (1.39-2.04)        | 1.62 (0.36)        | 2.57 (2.18-3.29)        | 2.68 (0.59)        |
| Parent worry                                            | 3.33 (1.00-4.33)        | 2.95 (1.70)        | 1.67 (1.25-2.17)        | 1.72 (0.57)        | 1.67 (1.08-3.25)        | 2.00 (1.19)        |
| Parent impact                                           | 1.20 (1.00-3.20)        | 1.94 (1.08)        | 1.00 (1.00-1.00)        | 1.00 (0.00)        | 1.70 (1.15-2.25)        | 1.70 (0.58)        |
| <b>6-month Follow-up (n)</b>                            | <b>7</b>                |                    | <b>6</b>                |                    | <b>5</b>                |                    |
| Scar age post injury(months)                            | 6.00 (6.00-6.00)        | 6.14 (0.38)        | 6.00 (6.00-6.00)        | 6.00 (0.00)        | 7.00 (5.50-7.00)        | 6.40 (0.89)        |
| <i>Overall impact of burns</i>                          | <i>1.63 (1.38-1.75)</i> | <i>1.55 (0.31)</i> | <i>1.00 (1.00-1.03)</i> | <i>1.02 (0.05)</i> | <i>1.38 (1.13-2.38)</i> | <i>1.68 (0.70)</i> |
| Sensory Frequency                                       | 1.67 (1.00-2.33)        | 1.76 (0.63)        | 1.00 (1.00-1.08)        | 1.06 (0.14)        | 1.67 (1.00-2.83)        | 1.87 (0.93)        |
| Sensory Sensitivity                                     | 0.00 (0.00-1.00)        | 0.43 (0.53)        | 1.00 (0.75-1.50)        | 1.17 (0.98)        | 1.00 (0.00-2.00)        | 1.00 (1.00)        |
| Mobility                                                | 1.00 (1.00-1.25)        | 1.11 (0.34)        | 1.25 (1.19-1.38)        | 1.29 (0.25)        | 1.25 (1.00-1.50)        | 1.25 (0.25)        |
| Daily Living                                            | 1.56 (1.00-1.56)        | 1.35 (0.27)        | 1.00 (1.00-1.00)        | 1.00 (0.00)        | 1.78 (1.56-2.17)        | 1.84 (0.31)        |
| Impact of scar daily routine                            | 1.00 (1.00-1.00)        | 1.00 (0.00)        | 1.00 (1.00-1.00)        | 1.00 (0.00)        | 1.00 (1.00-1.50)        | 1.20 (0.45)        |
| Impact of scar on developing independence or new skills | 1.00 (1.00-1.00)        | 1.00 (0.00)        | 1.00 (1.00-1.00)        | 1.00 (0.00)        | 1.00 (1.00-1.00)        | 1.00 (0.00)        |
| Friendship and social interaction                       | 1.00 (1.00-1.33)        | 1.14 (0.18)        | 1.00 (1.00-1.00)        | 1.00 (0.00)        | 1.00 (1.00-1.67)        | 1.27 (0.43)        |
| Appearance                                              | 1.00 (1.00-2.00)        | 1.29 (0.78)        | 1.00 (1.00-1.17)        | 1.11 (0.27)        | 1.33 (1.00-1.67)        | 1.33 (0.33)        |
| Child bothered by scar appearance                       | 1.00 (1.00-1.00)        | 0.86 (0.38)        | 1.00 (1.00-1.00)        | 1.00 (0.00)        | 1.00 (1.00-2.00)        | 1.40 (0.55)        |
| Emotional reactions                                     | 1.14 (1.14-1.29)        | 1.04 (0.47)        | 1.14 (1.11-1.18)        | 1.14 (0.09)        | 1.43 (1.14-2.36)        | 1.69 (0.64)        |
| Physical symptoms                                       | 1.86 (1.43-2.43)        | 1.92 (0.67)        | 1.29 (1.11-1.36)        | 1.26 (0.19)        | 2.00 (1.43-2.57)        | 2.00 (0.71)        |
| Parent worry                                            | 1.33 (1.00-1.67)        | 1.48 (0.60)        | 1.00 (1.00-1.08)        | 1.06 (0.14)        | 1.33 (1.00-2.33)        | 1.60 (0.83)        |
| Parent impact                                           | 1.00 (1.00-1.20)        | 1.11 (0.16)        | 1.00 (1.00-1.00)        | 1.00 (0.00)        | 1.00 (1.00-1.50)        | 1.20 (0.28)        |
| <b>12-month Follow-up (n)</b>                           | <b>7</b>                |                    | <b>5</b>                |                    | <b>4</b>                |                    |

|                                                         |                         |                    |                         |                    |                         |                    |
|---------------------------------------------------------|-------------------------|--------------------|-------------------------|--------------------|-------------------------|--------------------|
| Scar age post injury(months)                            | 12.00 (12.0-13.00)      | 12.29 (0.49)       | 12.00 (12.00-13.00)     | 12.40 (0.55)       | 12.00 (12.00-12.75)     | 12.25 (0.50)       |
| <i>Overall impact of burns</i>                          | <i>1.13 (1.00-3.00)</i> | <i>1.71 (0.95)</i> | <i>1.00 (1.00-1.00)</i> | <i>1.00 (0.00)</i> | <i>1.38 (1.09-1.56)</i> | <i>1.34 (0.26)</i> |
| Sensory Frequency                                       | 1.00 (1.00-2.00)        | 1.38 (0.68)        | 1.00 (1.00-1.00)        | 1.00 (0.00)        | 1.50 (1.00-2.25)        | 1.58 (0.69)        |
| Sensory Sensitivity                                     | 1.00 (0.00-3.00)        | 1.29 (1.60)        | 0.00 (0.0-1.00)         | 0.40 (0.55)        | 0.50 (0.00-2.50)        | 1.00 (1.41)        |
| Mobility                                                | 1.25 (1.00-2.50)        | 2.00 (1.44)        | 1.00 (1.0-1.25)         | 1.10 (0.14)        | 1.13 (1.00-1.63)        | 1.25 (0.35)        |
| Daily Living                                            | 1.00 (1.00-2.11)        | 1.84 (1.51)        | 1.00 (1.00-1.00)        | 1.00 (0.00)        | 1.11 (1.00-1.47)        | 1.19 (0.26)        |
| Impact of scar daily routine                            | 1.00 (1.00-2.00)        | 1.86 (1.86)        | 1.00 (1.00-1.00)        | 1.00 (0.00)        | 1.00 (1.00-1.00)        | 1.00 (0.00)        |
| Impact of scar on developing independence or new skills | 1.00 (1.00-2.00)        | 1.71 (1.50)        | 1.00 (1.00-1.00)        | 1.00 (0.00)        | 1.00 (1.00-1.00)        | 1.00 (0.00)        |
| Friendship and social interaction                       | 1.00 (1.00-2.00)        | 1.70 (1.50)        | 1.00 (1.00-1.00)        | 1.00 (0.00)        | 1.00 (1.00-1.25)        | 1.08 (0.17)        |
| Appearance                                              | 1.00 (1.00-2.00)        | 1.57 (0.89)        | 1.00 (1.00-1.17)        | 1.07 (0.15)        | 1.33 (1.08-1.58)        | 1.33 (0.27)        |
| Child bothered by scar appearance                       | 1.00 (1.00-1.00)        | 1.14 (0.38)        | 1.00 (1.00-1.00)        | 1.00 (0.00)        | 1.00 (1.00-1.75)        | 1.25 (0.50)        |
| Emotional reactions                                     | 1.14 (1.14-1.29)        | 1.25 (0.21)        | 1.14 (1.14-1.14)        | 1.14 (0.00)        | 1.21 (1.14-1.39)        | 1.25 (0.14)        |
| Physical symptoms                                       | 1.71 (1.00-2.00)        | 1.86 (0.98)        | 1.14 (1.14-1.43)        | 1.23 (0.19)        | 2.00 (1.75-2.14)        | 1.96 (0.21)        |
| Parent worry                                            | 1.33 (1.00-2.33)        | 1.57 (0.79)        | 1.00 (1.00-1.17)        | 1.07 (0.15)        | 1.17 (1.00-1.58)        | 1.25 (0.32)        |
| Parent impact                                           | 1.00 (1.00-1.60)        | 1.20 (0.35)        | 1.00 (1.00-1.00)        | 1.00 (0.00)        | 1.00 (1.00-1.00)        | 1.00 (0.00)        |

**Abbreviation:** IQR: Interquartile range; SD: Standard deviation; RES<sup>TM</sup>: Regenerative Epidermal Suspension.

**Supplementary File S6. Paediatric Health Related Quality Of Life Based On Parent Reported Chu9d.**

| Parent/Guardian CHU9D        | Silver dressings | RES™ /Biobrane® | Biobrane® only |
|------------------------------|------------------|-----------------|----------------|
| <b>3-month Follow up (n)</b> | 7                | 6               | 5              |
| Median                       | 0.94             | 1.00            | 0.75           |
| IQR                          | 0.76-1.00        | 0.77-1.00       | 0.44-0.93      |
| Mean                         | 0.88             | 0.87            | 0.70           |
| Total Range                  | 0.35             | 0.68            | 0.64           |
| <b>6-month Follow up (n)</b> | 7                | 6               | 5              |
| Median                       | 0.94             | 0.94            | 0.97           |
| IQR                          | 0.90-1.00        | 0.78-1.00       | 0.55-1.00      |
| Mean                         | 0.94             | 0.91            | 0.81           |
| Total Range                  | 0.16             | 0.22            | 0.53           |
| <b>12-month Follow up(n)</b> | 7                | 5               | 4              |
| Median                       | 1.00             | 1.00            | 0.98           |
| IQR                          | 0.92-1.00        | 0.89-1.00       | 0.85-1.00      |
| Mean                         | 0.98             | 0.96            | 0.95           |
| Total Range                  | 0.09             | 0.22            | 0.19           |

**Abbreviation:** IQR: Interquartile range; CHU9D: Child Health Utility.

**Supplementary File S7. Health resource utilisation.**

| Health Resource Utilisation<br>(n)  | Silver dressings<br>8  | RES™ /Biobrane®<br>7 | Biobrane®<br>7        |
|-------------------------------------|------------------------|----------------------|-----------------------|
| <b>Intervention Cost</b>            |                        |                      |                       |
| <i>Initial Dressing Application</i> |                        |                      |                       |
| Median                              | \$291.30               | \$9262.00            | \$667.92              |
| IQR                                 | \$194.02-\$438.05      | \$8830.10-\$21280.70 | \$498.97-\$1361.72    |
| Mean                                | \$344.23               | \$13464.94           | \$847.15              |
| Total Range                         | \$552.90               | \$13525.19           | \$1608.14             |
| <i>Dressing Change</i>              |                        |                      |                       |
| Median                              | \$645.87               | \$63.91              | \$385.38              |
| IQR                                 | \$278.70-\$933.43      | \$28.34-\$891.83     | \$261.33-\$666.81     |
| Mean                                | \$612.65               | \$358.52             | \$521.05              |
| Total Range                         | \$1202.25              | \$906.51             | \$1268.67             |
| <b>Hospitalisation Setting</b>      |                        |                      |                       |
| <i>Emergency Department</i>         |                        |                      |                       |
| Median                              | \$851.04               | \$642.29             | \$825.42              |
| IQR                                 | \$548.62-\$1414.20     | \$367.99 - \$1270.38 | \$443.87 - \$1495.54  |
| Mean                                | \$936.53               | \$770.60             | \$1084.42             |
| Total Range                         | \$1362.27              | \$1152.79            | \$2860.90             |
| <i>Inpatient</i>                    |                        |                      |                       |
| Median                              | \$32581.93             | \$21707.34           | \$47058.00            |
| IQR                                 | \$6737.32 - \$73070.61 | \$4424.21-\$76438.30 | \$1466.41-\$102527.18 |
| Mean                                | \$3877.28              | \$42363.14           | \$56236.73            |
| Total Range                         | \$95006.06             | \$128111.42          | \$97086.05            |
| <i>Outpatient</i>                   |                        |                      |                       |
| Median                              | \$314.16               | \$314.57             | \$314.16              |
| IQR                                 | \$304.87 - \$444.67    | \$304.87-\$424.34    | \$304.87 - \$380.71   |
| Mean                                | \$370.23               | \$353.39             | \$336.67              |
| Total Range                         | \$852.22               | \$850.02             | \$388.53              |

**Abbreviation: IQR:** Interquartile range.
